# Supplementary material for: Extended-range luminescence dating of quartz and alkali feldspar from aeolian sediments in the eastern Mediterranean
Source: Copernicus journal article supplement (doi:10.5194/gchron-2-101-2020), 2020-05-07
Supplement: Supplementary file 1 [file gchron-2-101-2020-supplement.pdf]

Supplement of Geochronology, 2, 101–118, 2020  
<https://doi.org/10.5194/gchron-2-101-2020-supplement>  
© Author(s) 2020. This work is distributed under  
the Creative Commons Attribution 4.0 License.

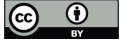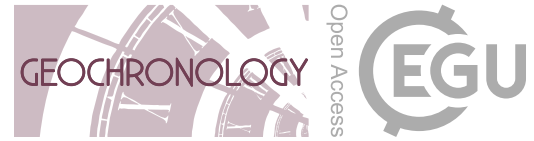

*Supplement of*

## **Extended-range luminescence dating of quartz and alkali feldspar from aeolian sediments in the eastern Mediterranean**

**Galina Faershtein et al.**

*Correspondence to:* Galina Faershtein (galaf@gsi.gov.il)

The copyright of individual parts of the supplement might differ from the CC BY 4.0 License.

### **Alkali-feldspar separation**

The standard alkali-feldspar separation procedure includes two steps of heavy liquid separation at 2.62 and 2.58 gr cm<sup>-3</sup> (Aitken et al., 1998) and is time consuming. In order to make the separation procedure more efficient, other separation methods were explored. Two samples from the Kerem Shalom (KR) section (KR-7, KR-9) were separated by three different methods: the standard two-step separation with heavy liquids (procedure A); magnetic separation through a LB-1 Frantz magnetic separator, using a current of 1.4 A on the magnet, followed by a one-step heavy liquid separation of the **nonmagnetic** fraction at 2.58 gr cm<sup>-3</sup> (procedure B); or the **magnetic** fraction at the same density (procedure C). All the density-separated fractions lighter than 2.58 gr cm<sup>-3</sup> were etched for 10 min with 10% HF solution (Porat et al., 2015) and measured with the pIR-IR<sub>290</sub> protocol (Table 2 in the main text; average of 6 aliquots) and were analyzed with the Scanning electron microscope (SEM). and Ar

For both samples, the *De* values obtained from measuring aliquots separated with procedures A, B, and C are, within errors, similar (Table S1). SEM mapping showed that all the separated fractions are mostly composed of quartz, K-feldspar and Na-feldspar minerals with variable proportions (Fig. S1). Element mapping showed that for procedure B, the grains were mostly K-feldspar minerals (Fig. S1), almost identical to the grains separated with procedure A. On the other hand, there were significantly less K-feldspar mineral grains separated with procedure C. Therefore, procedure B, with one-step density separation at 2.58 gr cm<sup>-3</sup> following magnetic separation, was selected for K-feldspar grains extraction. The heavy fraction of this separation can be farther used for quartz extraction.

**Table S1:** PIR-IR<sub>290</sub> *De* values measured for samples KR-7 and KR-9 separated by the different procedures. N=6.

| <b>Sample</b> | <b>Separation procedure</b> | <b><i>OD</i> (%)</b> | <b><i>De</i> (Gy)</b> |
|---------------|-----------------------------|----------------------|-----------------------|
| KR-7          | A                           | 17                   | 168±29                |
|               | B                           | 6                    | 161±12                |
|               | C                           | 1                    | 196±7                 |
| KR-9          | A                           | 5                    | 194±12                |
|               | B                           | 10                   | 224±27                |
|               | C                           | 10                   | 226±28                |

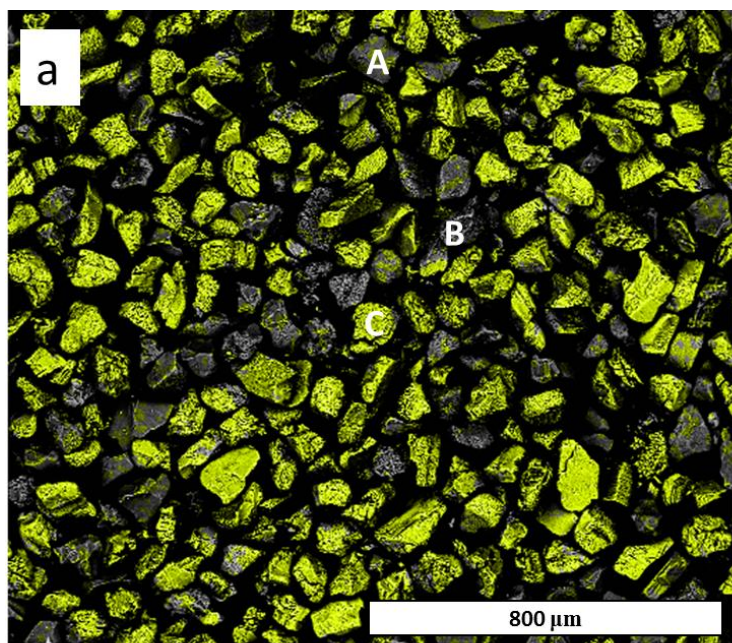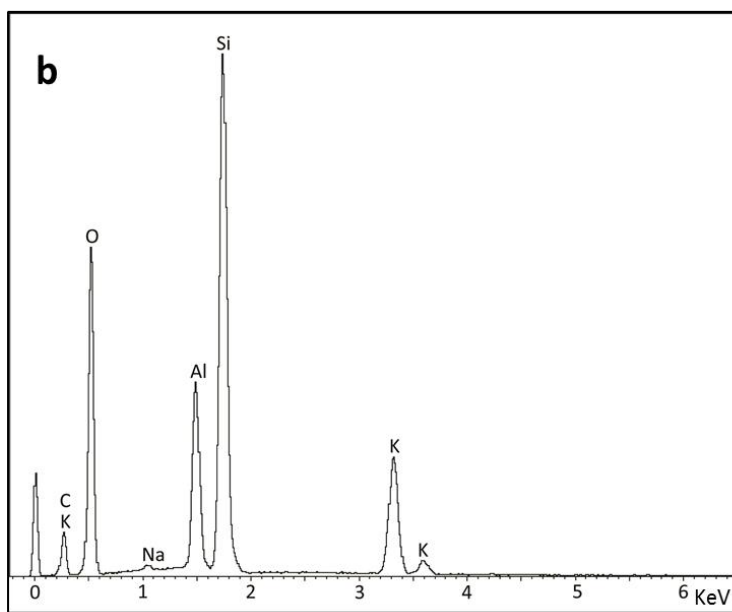

**Figure S1:** SEM results of sample KR-7 separated using procedure B. a) SEM image of the sample. Grains rich with potassium are colored in yellow. The sample contains Na-feldspar (A) quartz (B) K- feldspar (C – the majority of grains). B) SEM EDS composition spectra of mineral grain C indicating K-feldspar composition.

**Table S2:** Fading correction results of sample KR-1 following Kars et al. (2008) correction using the calc\_Huntley2006 R function (King and Burow, 2019). The calc\_Huntley2006 function was applied to all aliquots of samples KR-1, which were previously used for *De* determination. Then the function was applied using the average Ln/Tn value (with standard deviation) and a combined DRC of these aliquots. The average output parameters are almost identical (0-4% difference).

| Aliquot  | $(n/N)^a$ | $(n/N)_{ss}^b$ | Measured DRC   |                |          | Natural simulated DRC |                |          |                      |
|----------|-----------|----------------|----------------|----------------|----------|-----------------------|----------------|----------|----------------------|
|          |           |                | <i>De</i> [Gy] | <i>Do</i> [Gy] | Age [ka] | <i>De</i> [Gy]        | <i>Do</i> [Gy] | Age [ka] | 2 <i>Do</i> Age [ka] |
| 1        | 0.69±0.03 | 0.69±0.19      | 604±39         | 385±14         | 572±56   | NaN                   | 414±2          | NaN      | 784±57               |
| 3        | 0.70±0.03 | 0.69±0.20      | 603±38         | 371±12         | 571±55   | NaN                   | 401±2          | NaN      | 758±55               |
| 5        | 0.69±0.03 | 0.69±0.19      | 603±39         | 371±11         | 571±56   | NaN                   | 401±2          | NaN      | 758±55               |
| 7        | 0.70±0.03 | 0.69±0.20      | 603±34         | 371±12         | 571±52   | NaN                   | 401±2          | NaN      | 758±55               |
| 9        | 0.76±0.03 | 0.69±0.20      | 748±79         | 369±14         | 708±91   | NaN                   | 392±2          | NaN      | 742±54               |
| 11       | 0.65±0.03 | 0.69±0.20      | 486±26         | 352±13         | 460±41   | 1137±177              | 382±1          | 1076±185 | 724±53               |
| 13       | 0.79±0.03 | 0.69±0.19      | 779±82         | 340±13         | 737±94   | NaN                   | 359±2          | NaN      | 679±50               |
| 15       | 0.70±0.03 | 0.69±0.20      | 545±36         | 330±11         | 515±51   | NaN                   | 355±2          | NaN      | 672±49               |
| Average  | 0.71±0.04 | 0.69±0.00      | 621±97         | 361±19         | 588±92   | NaN                   | 388±21         | NaN      | 734±40               |
| Combined | 0.71±0.07 | 0.69±0.19      | 595±177        | 348±4          | 563±172  | NaN                   | 378±2          | NaN      | 715±52               |

<sup>a</sup> The level of saturation.

<sup>b</sup> The field saturation.

**Table S3:** Details of additional samples used in the study for various experiments. All samples are of aeolian sediments originated from the Nile.

| <b>Sample</b> | <b>site</b>      | <b>Mineral</b> | <b>Grain size (µm)</b> | <b>Source</b>                                                              | <b>Remarks</b>             |
|---------------|------------------|----------------|------------------------|----------------------------------------------------------------------------|----------------------------|
| DF-13         | Negev Dune field | quartz         | 150-177                | Roskin et al., 2011                                                        | OSL age 40±10 years        |
| ML-D-13       | Shefayim         | feldspar       | 150-177                | Geological Survey of Israel (GSI) luminescence laboratory unpublished data | Modern beach sample        |
| RUH-40        | Ruhama           | quartz         | 90-125                 | GSI luminescence laboratory unpublished data                               | TT-OSL <i>De</i> 42±2 Gy   |
| RUH-90        | Ruhama           | quartz         | 90-125                 | GSI luminescence laboratory unpublished data                               | TT-OSL <i>De</i> 53±3 Gy   |
| RUH-180       | Ruhama           | quartz         | 90-125                 | GSI luminescence laboratory unpublished data                               | TT-OSL <i>De</i> 163±15 Gy |
| RUH-300       | Ruhama           | quartz         | 90-125                 | GSI luminescence laboratory unpublished data                               | TT-OSL <i>De</i> 264±11 Gy |

**Table S4:** Fading data for Kerem Shalom samples. For each sample the  $g$ -value and  $\rho'$  of 3 aliquots and averages are presented. Samples KR-11 to KR-15 were not measured for fading.

| Sample | Depth [m] | $g$ -value (% per decade) | Average $g$ -value (% per decade) | $\rho'$ (*10 <sup>-6</sup> ) | Average $\rho'$ (*10 <sup>-6</sup> ) |
|--------|-----------|---------------------------|-----------------------------------|------------------------------|--------------------------------------|
| KR-17  | 0.5       | 0.7±0.53                  | 1.43±0.63                         | 0.71±0.55                    | 1.50±0.69                            |
|        |           | 1.84±0.51                 |                                   | 1.95±0.54                    |                                      |
|        |           | 1.75±0.51                 |                                   | 1.85±0.54                    |                                      |
| KR-6   | 1.5       | 1.42±0.51                 | 1.47±0.18                         | 1.50±0.53                    | 1.55±0.20                            |
|        |           | 1.67±0.50                 |                                   | 1.77±0.53                    |                                      |
|        |           | 1.32±0.50                 |                                   | 1.39±0.54                    |                                      |
| KR-16  | 1.5       | 1.51±0.51                 | 1.24±0.44                         | 1.59±0.54                    | 1.14±0.57                            |
|        |           | 0.73±0.52                 |                                   | 0.74±0.54                    |                                      |
|        |           | 1.48±0.51                 |                                   | 1.54±0.54                    |                                      |
| KR-7   | 2.3       | 2.75±0.53                 | 1.49±1.09                         | 2.92±0.57                    | 1.58±1.16                            |
|        |           | 0.9±0.56                  |                                   | 0.94±0.59                    |                                      |
|        |           | 0.82±0.55                 |                                   | 0.87±0.57                    |                                      |
| KR-8   | 3         | 1.06±0.54                 | 1.35±0.28                         | 1.11±0.58                    | 1.41±0.28                            |
|        |           | 1.38±0.54                 |                                   | 1.44±0.58                    |                                      |
|        |           | 1.61±0.55                 |                                   | 1.67±0.58                    |                                      |
| KR-5   | 4.1       | 1.44±0.50                 | 1.21±0.20                         | 1.52±0.53                    | 1.28±0.21                            |
|        |           | 1.11±0.49                 |                                   | 1.17±0.53                    |                                      |
|        |           | 1.08±0.49                 |                                   | 1.14±0.52                    |                                      |
| KR-9   | 4.1       | 0.96±0.58                 | 1.54±0.84                         | 1.02±0.61                    | 1.64±0.89                            |
|        |           | 1.16±0.58                 |                                   | 1.25±0.60                    |                                      |
|        |           | 2.5±0.56                  |                                   | 2.66±0.61                    |                                      |
| KR-10  | 5.2       | 1.52±0.58                 | 1.63±0.28                         | 1.61±0.62                    | 1.70±0.34                            |
|        |           | 1.95±0.57                 |                                   | 2.07±0.56                    |                                      |
|        |           | 1.42±0.58                 |                                   | 1.41±0.61                    |                                      |
| KR-3   | 10.7      | 1.71±0.48                 | 1.66±0.28                         | 1.82±0.51                    | 1.76±0.30                            |
|        |           | 1.36±0.48                 |                                   | 1.43±0.51                    |                                      |
|        |           | 1.91±0.52                 |                                   | 2.03±0.56                    |                                      |
| KR-2   | 12.5      | 1.4±0.6                   | 1.20±0.18                         | 1.47±0.64                    | 1.26±0.19                            |
|        |           | 1.08±0.56                 |                                   | 1.13±0.60                    |                                      |
|        |           | 1.11±0.52                 |                                   | 1.17±0.55                    |                                      |
| KR-1   | 15.3      | 0.92±0.78                 | 1.17±0.36                         | 1.00±0.46                    | 1.32±0.38                            |
|        |           | 1.01±1.05                 |                                   | 1.23±0.94                    |                                      |
|        |           | 1.58±0.46                 |                                   | 1.74±0.52                    |                                      |

**Table S5:** VSL MAAD ages. The  $Ln/Tn$  values of the KR samples were projected onto the MAAD DRC constructed for the modern quartz sample DF-13 fitted with one exponential plus linear and two exponentials function.

| Sample | Depth (m) | Dose rate (Gy kyr <sup>-1</sup> ) | $Ln/Tn$   | One exponential plus lineal function |          | Two exponentials function             |                                       |
|--------|-----------|-----------------------------------|-----------|--------------------------------------|----------|---------------------------------------|---------------------------------------|
|        |           |                                   |           | $De$ (Gy)                            | Age (ka) | $De$ (Gy)                             | Age (ka)                              |
| KR-6   | 1.5       | 1.22±0.07                         | 0.22±0.09 | 29±18                                | 24±14    | 24 <sup>+43</sup> <sub>-10</sub>      | 20 <sup>+35</sup> <sub>-8</sub>       |
| KR-16  | 1.5       | 1.20±0.06                         | 0.15±0.02 | 17±3                                 | 14±3     | 13 <sup>+17</sup> <sub>-10</sub>      | 11 <sup>+14</sup> <sub>-9</sub>       |
| KR-7   | 2.3       | 1.60±0.08                         | 0.29±0.05 | 45±12                                | 28±8     | 40 <sup>+53</sup> <sub>-29</sub>      | 25 <sup>+33</sup> <sub>-18</sub>      |
| KR-8   | 3         | 1.56±0.08                         | 0.42±0.02 | 87±8                                 | 56±5     | 85 <sup>+96</sup> <sub>-76</sub>      | 55 <sup>+62</sup> <sub>-49</sub>      |
| KR-5   | 4.1       | 1.32±0.07                         | 0.46±0.05 | 108±29                               | 82±22    | 113 <sup>+161</sup> <sub>-82</sub>    | 85 <sup>+122</sup> <sub>-62</sub>     |
| KR-9   | 4.1       | 1.23±0.07                         | 0.48±0.07 | 121±51                               | 98±42    | 131 <sup>+221</sup> <sub>-83</sub>    | 106 <sup>+179</sup> <sub>-67</sub>    |
| KR-10  | 5.2       | 1.36±0.07                         | 0.57±0.07 | 227±175                              | 166±128  | 265 <sup>+449</sup> <sub>-155</sub>   | 194 <sup>+329</sup> <sub>-114</sub>   |
| KR-11  | 5.8       | 1.54±0.08                         | 0.69±0.10 | 785±514                              | 510±334  | 726 <sup>+6215</sup> <sub>-320</sub>  | 472 <sup>+4041</sup> <sub>-208</sub>  |
| KR-4   | 6.3       | 1.56±0.08                         | 0.49±0.07 | 130±57                               | 83±37    | 144 <sup>+243</sup> <sub>-90</sub>    | 92 <sup>+156</sup> <sub>-58</sub>     |
| KR-12  | 7.2       | 1.70±0.09                         | 0.61±0.08 | 352±296                              | 208±174  | 361 <sup>+693</sup> <sub>-196</sub>   | 213 <sup>+408</sup> <sub>-115</sub>   |
| KR-13  | 8.2       | 1.01±0.05                         | 0.64±0.05 | 508±240                              | 501±237  | 462 <sup>+705</sup> <sub>-317</sub>   | 456 <sup>+696</sup> <sub>-313</sub>   |
| KR-14  | 9.5       | 1.27±0.05                         | 0.72±0.07 | 954±370                              | 749±291  | 1094 <sup>+6064</sup> <sub>-518</sub> | 860 <sup>+4763</sup> <sub>-407</sub>  |
| KR-3   | 10.7      | 1.05±0.06                         | 0.51±0.09 | 149±133                              | 141±126  | 170 <sup>+362</sup> <sub>-87</sub>    | 162 <sup>+344</sup> <sub>-82</sub>    |
| KR-15  | 11.7      | 0.73±0.04                         | 0.70±0.10 | 826±526                              | 1131±720 | 788 <sup>+6256</sup> <sub>-337</sub>  | 1080 <sup>+8570</sup> <sub>-462</sub> |
| KR-2   | 12.5      | 0.68±0.04                         | 0.63±0.13 | 458±511                              | 674±751  | 429 <sup>+6208</sup> <sub>-155</sub>  | 631 <sup>+9130</sup> <sub>-229</sub>  |
| KR-1   | 15.3      | 0.68±0.05                         | 0.70±0.05 | 815±260                              | 1200±382 | 773 <sup>+5256</sup> <sub>-498</sub>  | 1137 <sup>+7730</sup> <sub>-732</sub> |
| DF-13  |           |                                   | 0.02±0.01 |                                      |          |                                       |                                       |



## References:

- Aitken, M.J.: An Introduction to Optical Dating: the Dating of Quaternary Sediments by the Use of Photon-stimulated Luminescence. Oxford University Press, 1998.
- Kars, R.H., Wallinga, J., Cohen, K.M.: A new approach towards anomalous fading correction for feldspar IRSL dating — tests on samples in field saturation. *Radiation Measurements* 43, 786–790, 2008.
- King, G.E., Burow, C.: `calc_Huntley2006()`: Apply the Huntley (2006) model. Function version 0.4.1. In: Kreutzer, S., Burow, C., Dietze, M., Fuchs, M.C., Schmidt, C., Fischer, M., Friedrich, J.: *Luminescence: Comprehensive Luminescence Dating Data Analysis* R package version 0.9.5. <https://CRAN.R-project.org/package=Luminescence>, 2019.
- Porat, N., Faershtein, G., Medialdea, A., Murray, A.S.: Re-examination of common extraction and purification methods of quartz and feldspar for luminescence dating. *Ancient TL* 33, 22-30, 2015.
- Roskin, J., Porat, N., Tsoar, H., Blumberg, D.G., Zander, A.M.: Age, origin and climatic controls on vegetated linear dunes in the northwestern Negev Desert (Israel). *Quaternary Science Reviews* 30, 1649-1674, 2011.
